# Supplementary material for: Temporospatial shifts within commercial laboratory mouse gut microbiota impact experimental reproducibility
Source: PubMed Central journal article supplement (PMC7334859; doi:10.1186/s12915-020-00810-7), 2020-07-03

Additional File Figure S3

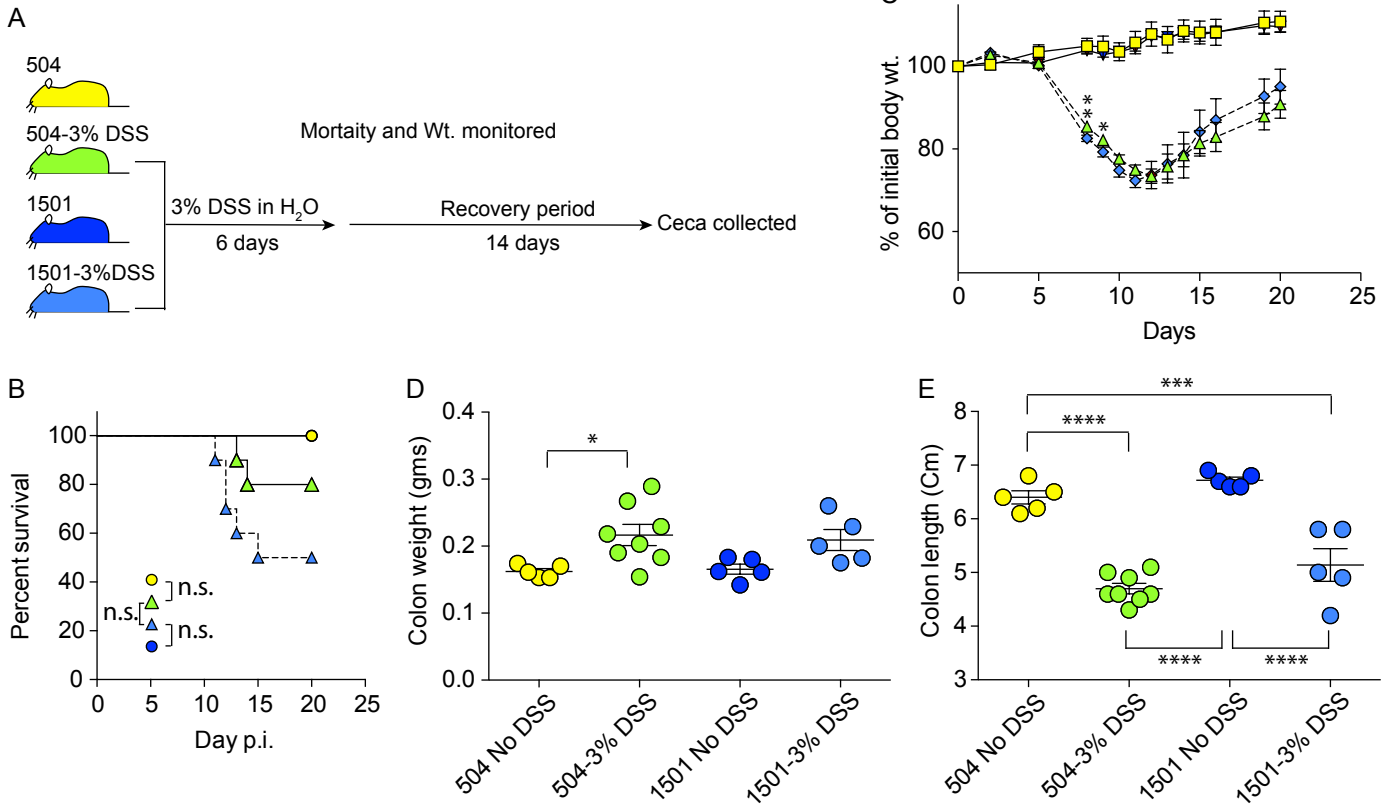

Supplement: 12915_2020_810_MOESM3_ESM.pdf [file 12915_2020_810_MOESM3_ESM.pdf]
